1 **Toxic Effects of Crude Extracts from Chinese Herbal Toothpastes on *Solenopsis***

2 ***invicta* (Hymenoptera: Formicidae)**

3 Qian Xiao<sup>1†</sup>, Babar Hassan<sup>1†</sup>, Junzhao Luo<sup>1†</sup>, Yijuan Xu<sup>1\*</sup>

4

5 1Red Imported Fire Ant Research Center, South China Agricultural University,

6 Guangzhou, China

7 \* Correspondence: [xuyijuan@yahoo.com](mailto:xuyijuan@yahoo.com)

8 ¶ These authors contributed equally to this work.

## 9 **Abstract**

10 Red imported fire ant is an invasive species with the characteristics of quick dispersion,  
11 strong ferocity and aggression. For a long time, chemical control has been used as a  
12 main means of prevention and control of this pest, but the long-term use of high toxic  
13 pesticides will lead to a serious impact on the environment and non-target organisms.  
14 The toxicity of Chinese herbal toothpaste and its crude extracts against red imported  
15 fire ant was evaluated in the laboratory bioassay. The results showed that the traditional  
16 Chinese medicine toothpaste with watermelon cream has significant toxicity to red  
17 imported fire ants. The mortality reached more than 80% after 48h treatment, and the  
18 mortality was 100% after 72h treatment. Among the fractions separated from  
19 watermelon cream after the extraction of toothpaste, the ethyl acetate fraction has  
20 higher activity, and the mortality was more than 80% when the concentration was 1%  
21 after 72h. Our results suggest that Chinese herbal toothpaste is toxic to insects and have  
22 the potential for bait application in pest control.

23 **Key words:** Red imported fire ant, Toothpaste of traditional Chinese Medicine, Toxic  
24 activity

25

26

27

28

## 29 **Introduction**

30 *Solenopsis invicta* Buren, the red imported fire ant, is an important invasive insect  
31 with the characteristics of quick dispersion, strong ferocity and aggression. It causes  
32 severe damage to agriculture and poultry production, ecosystem and human health [1].  
33 At present, chemical control is the most widely used method to control red imported  
34 fire ants. Several insecticides have been registered and used against this insect pest [2].  
35 These insecticides are mainly used by flooding the mounds with water, as a powder and  
36 poisonous baits [3]. Carbaryl, diazinon, chlorpyrifos and some other insecticides are  
37 used for flooding the mounds. The main components of powder are cypermethrin and  
38 fluronitrile. Similarly, several slow releasing insecticides and insect growth regulators  
39 are usually used as poisonous bait [3].

40 Although chemical control works well, but the major concern in using these  
41 insecticides is, their negative effect on environment and these are also harmful to non-  
42 target organisms [4]. Moreover, sustained insect resistance against synthetic  
43 insecticides has also invigorated the development of unconventional insect pest  
44 management practices. Therefore, search for new insecticide with different mode action,  
45 low mammalian toxicity, having less impact on biodiversity and environment is major  
46 theme of pest control. Several plants derived chemicals have been used as a safer and  
47 green pesticides against red imported fire ants. For example, two terpenoids isolated  
48 from leaves of American beautyberry (*Callicarpa americana* L.) and Japanese  
49 beautyberry (*Callicarpa japonica* Thunb.), and essential oil from *Cupressus*  
50 *nootkatensis* (D. Don) showed repellent and toxic effects against *S. invicta*, *S. richteri*

51 Forel, and a hybrid of these two species at very low concentrations [5, 6]. Both clove  
52 powder and clove oil have shown promising results in against the red imported fire ant  
53 [7]. Natural sweetener, erythritol, has a good toxic effect on red imported fire ants,  
54 and significantly affected the foraging behavior and necrophoric behavior of the fire  
55 ants [8]. The food additives such as ethyl anthranilate and butyl anthranilate, can  
56 prevent fire ant nesting in pots [9].

57 The active ingredients of Chinese medicine are extracted from Chinese herbal  
58 plants, such as *radix zanthoxyli* (dried root of *Zanthoxylum nitidum* (Roxb.) D.C.),  
59 *Morus alba* L., *Rhizoma rehmanniae* dihuang *Artemisia vulgaris* L., *Coptis chinensis*  
60 Franch, *Panax pseudoginseng* (Burk.), *Taraxacum* spp. and many others plants [10, 11].  
61 Previously, several studies showed that some active ingredients in traditional Chinese  
62 medicine have toxic effects against several microorganisms and pests [12]. For example,  
63 the extracts of *Radix aconitum* L., *Gelsmium elegans* Benth, *Impatiens balsamina* L.  
64 and *Polygala tenuifolia* Willdenow can inhibit the growth of hypha of tomato  
65 necrotrophic fungus, *Botrytis cinerea*, and the inhibition rate increases as the  
66 concentration of the extracts increases [13]. Three traditional Chinese medicine of  
67 *Cinnamomum cassia*, *Eugenia caryophyllata* and *Pogostemon cablin* have strong  
68 insecticidal activity against house dust mites [14]. Similarly, the constituents of  
69 patchouli oil extracted from *Pogostemon cablin* (Blanco) BENTH has great acaricidal  
70 activity against house dust mite, *Dermatophagoides farinae* (Wu et al., 2012).

71 To our knowledge, the potential of Chinese herbs or herbal medicine as a control  
72 agent of fire ants have not been tested, previously. Therefore, in this study, we wanted

73 to test different Chinese herbal toothpastes with good control effect on red imported  
74 fire ants and low mammalian toxicity to achieve sustainable development in less toxic  
75 pesticides and effective management of red imported fire ants.

## 76 **Materials and methods**

### 77 **Insect**

78 Red imported fire ant, *S. invicta*, were collected from Tianhe District Wisdom Park,  
79 Guangzhou, Guangdong province, China. Spades were used to dig the nest of ants, and  
80 these were moved quickly into plastic barrel. Before digging, plastic barrel walls, spade  
81 handles, rubber gloves and long rainwater boots were coated with Fluon to prevent red  
82 fire ants from climbing. After collection, the inner and outer walls of the barrel were  
83 coated with Fluon again to avoid escape of ants [15].

84 The ant colonies were raised in plastic boxes (40cm×26cm×10cm), with Fluon  
85 solution coated in the inner wall to prevent escape of insects. The indoor feeding  
86 temperature was  $25 \pm 1$  °C and humidity was 60 - 70%. We placed petri dishes (9 cm  
87 dia) with wet gypsum as an artificial nest for ant colonies in each plastic box. A test  
88 tube (25 by 200 mm) that was partially filled with water and plugged with cotton was  
89 used as a water source. The fire ants were given a 10% solution of honey mixed with  
90 water (50 ml) weekly. Frozen locust, *Locusta migratoria manilensis*, were used as a  
91 food source.

### 92 **Reagent**

93 Bright blue dye (Zhengxing Food Additive Co., Ltd., Zhengzhou, Henan  
94 Province), PBS buffer, ethanol (Shengxinyuan Weiye Trade Co., Ltd., Hebei District,  
95 Tianjin), ethyl acetate (Shengxinyuan Weiye Trade Co., Ltd., Hebei District, Tianjin),  
96 sucrose (Taigu Sugar Industry China Co., Ltd., Guangzhou, Guangdong province),  
97 Yunhan Watermelon cream toothpaste (Guilin Yunhan Daily Chemical Co., Ltd.),  
98 Pianzaihuang toothpaste (Zhangzhou Pianzaihuang Shanghai Jiahua Oral Care Co.,  
99 Ltd.), the details of ingredients and their manufacturers of twelve traditional Chinese  
100 medicine toothpaste is presented in Table 1.

## 101 **Comparison of toxicity of different traditional Chinese** 102 **medicine toothpaste to red imported fire ants**

103 In order to compare the toxicity of different traditional Chinese medicine  
104 toothpaste to red imported fire ant, about 30 workers were selected randomly and put  
105 into plastic bowl (3cm radius, 6cm high) after 12 hours of starvation. The plastic bowl  
106 was coated with Fluon to prevent ants from escaping. 10% of each toothpaste was  
107 prepared using distilled water as a solvent. A 2-ml centrifuge tube plugged with cotton  
108 with toothpaste solution was then introduced into the plastic bowl. Distilled water and  
109 10% sucrose solution were used as control treatment in the experiment and each  
110 treatment was repeated thrice. Mortality of workers was recorded after every 24 hours  
111 until three days and percentage mortality were calculated.

## 112 **Confirmation of toothpaste intake by ants**

113 In order to verify whether the workers have consumed the solution of traditional  
114 Chinese medicine toothpaste, the bright blue dye was mixed with the 0.01M PBS to  
115 produce 0.5% solution of dye. A total of 50 $\mu$ l dye solution was added to each Chinese  
116 traditional medicine toothpaste solution (10%) of watermelon cream and pinzaihuang.  
117 The mixture was fed to the ants in the same way as in toxicity test. Distilled water and  
118 10% sucrose solution were used as a control treatment. Each treatment was repeated  
119 three times. After 24 hours of feeding, the abdomens of the workers were squeezed to  
120 observe the presence of dye in the abdomen and percentage of insects have dye in the  
121 abdomen were calculated.

## 122 **Toxic effects of Watermelon Cream toothpaste against Red** 123 **Imported Fire ants**

124 In screening test, we found that Watermelon Cream toothpaste is most toxic to the  
125 workers. In order to compare the toxic effects of different concentrations of watermelon  
126 cream toothpaste solution against red imported fire ants, the toothpaste was mixed with  
127 distilled water at five different gradient concentrations: 0.5%, 1%, 5%, 10% and 20%.  
128 Toothpaste solution was added into centrifuge tubes (2 ml) and was plugged with small  
129 amount of cotton. Thirty workers were randomly selected after 12 hours starvation and  
130 were released in the plastic bowls. Tubes containing toothpaste solution were placed in  
131 the plastic bowls for feeding of ants. Distilled water and 10% sucrose solution were  
132 used as control treatment. Each treatment was repeated three times. Number of dead  
133 ants was recorded after every 24 hours until three days.

## 134 **Extraction of Yunhan Watermelon Cream toothpaste**

135 In order to identify the toxic active components of toothpaste to red imported fire  
136 ant, we soaked 1000.00 g Yunhan watermelon cream toothpaste in 380 ml ethanol  
137 (purity  $\geq 99.7\%$ ) and solution was stirred which lasts for 4 hours. This was repeated  
138 three times at room temperature. White precipitates (S-1) of 656.3 g were obtained by  
139 drying filterare residue.

140 Ethanol extract of toothpaste was obtained when filtrate was concentrated by  
141 rotating evaporation (50 °C). We added water to the ethanol extract and extracted it  
142 with ethyl acetate. The water layer and ethyl acetate layer were concentrated by rotating  
143 evaporation to obtain the water extract (S-2) of 202.8 g and the ethyl acetate extract  
144 (S-3) of 114.5 g (Fig. S1).

145 **Fig. S1** Extraction steps of Yunhan watermelon cream toothpaste.

## 146 **Toxic effects of extracts from Yunhan Watermelon Cream on** 147 **Red Imported Fire ants**

148 In order to compare the toxic activity of each component of the Yunhan  
149 Watermelon Cream toothpaste to the red imported fire ant, the three extracts of  
150 toothpaste, S-1, S-2, and S-3, were diluted into 1% and 10% concentration in their  
151 respective solvents and were added in 2mL centrifuge tubes. The tubes were plugged  
152 with cotton as describes earlier. Thirty workers were randomly selected, after 12 hours  
153 of starvation and were released in plastic bowls. Tubes containing toothpaste extracts



154 (S1-S3) were placed in plastic bowls to feed red fire ants. Distilled water and 10%  
155 sucrose solution were used as control treatment and each treatment was repeated three  
156 times. Number of dead red fire imported ants was recorded after every 24 hours until  
157 three days and percentage mortality were calculated.

## 158 **Selective preference of Red Imported Fire Ant to S-3 extract**

159 In order to assess whether toothpaste extract S-3 affect foraging preference of fire  
160 ants, 700 workers were randomly selected into rectangular plastic box (17cm × 11.5cm  
161 × 5.5cm) after 12 hours of starvation. The walls of plastic box were coated with Fluon  
162 to prevent ants from escaping. We took two 1.5mL centrifuge tubes, one containing  
163 10% sucrose solution, the other containing the 0.5% toothpaste extract solution (S-3  
164 extract + 10% sucrose). Small holes about the diameter of 1 mm were made near the  
165 mouth of tubes so that the solution does not flow out when inverted but the ants can  
166 suck it. After labeling, these were weighed using analytical balance. Both centrifuge  
167 tubes were placed upside down on the two ends of the plastic box respectively. After  
168 24 hours, the centrifuge tubes were taken out to weigh again. The actual amount of food  
169 consumed by red fire ants over the past 24 hours was obtained through the weight  
170 difference of the centrifuge tube. The control group was made by same material and  
171 environment without fire-imported ants. The amount of food consumed by ants of three  
172 different concentrations (0.5%, 1% and 2%) of S-3 and sucrose solution was calculated.

## 173 **Data Analysis**

174 All percentage mortality data were transformed using the arcsine transformation  
175 to meet the assumptions of normality. Analysis of variance (ANOVA) followed by  
176 Tukey's test for multiple was used for analysis of obtained data at 5% level of  
177 significance using SPSS 22.0. Binary choice tests to determine feeding preferences of  
178 ants for watermelon extracts were analyzed using a paired t-test comparison.

## 179 **Results**

### 180 **Comparison of toxicity of different traditional Chinese** 181 **medicine toothpaste to red imported fire ants**

182 Results of toxicity test showed that there was no significant difference between  
183 different toothpaste treatments in term of mortality of ants in the first 24 hours ( $P =$   
184  $0.105$ ). But there was significant difference in the mortality of red imported fire ants  
185 after 48 hours of treatment with twelve traditional Chinese medicine toothpaste and  
186 control treatment ( $F = 3.30$ ,  $df_1 = 13$ ,  $df_2 = 28$ ,  $P = 0.004$ ). Among them, the mortality  
187 of watermelon cream and Pinzaihuang was more than 80%, which was  
188 significantly higher than that of other toothpaste. The mortality of ten toothpaste was  
189 less than 70%, including four type of toothpaste of *Radix zanthoxyli*, three type of  
190 toothpaste of Saky, three type of toothpaste for Heimei, Yunnan Baiyao, and Pudilan.  
191 In the control group, the mortality ants on distilled water and sucrose was less than 30  
192 and 10%, respectively (Fig. 1).

193 **Fig. 1 Comparison of mortality (mean  $\pm$  standard error) of red imported fire**  
194 **ants after feeding on traditional Chinese medicine toothpastes for 48 hours. Bars**  
195 **with the same letter do not significantly differ (Tukey's test) at the 0.05**

196 **significance threshold.**

197       There was also a significant difference in mortality of red imported fire ants after  
198 72 hours treatment after feeding on twelve type of traditional Chinese medicine  
199 toothpaste ( $F = 8.484$ ,  $df_1 = 13$ ,  $df_2 = 28$ ,  $P < 0.0001$ ). Among them, the mortality rates  
200 of several traditional Chinese medicine toothpaste solutions, including *Radix zanthoxyli*  
201 4, Saky 1, Saky 3, Yunnan Baiyao, Pudilan, were more than 90%, while the death rates  
202 of watermelon cream and Pianzaihuang were 100%. The mortality rates of *Radix*  
203 *zanthoxyli* 1, *Radix zanthoxyli* 2, Saky 2 and Heimei were less than 80%. In the control  
204 group, the mortality of ants after feeding on distilled water and sucrose was less  
205 than 39.97 and 20 %, respectively (Fig. 2).

206 **Fig. 2 Comparison of mortality (mean  $\pm$  standard error) of red imported fire**  
207 **ants after feeding on traditional Chinese medicine toothpaste for 72 hours. Bars**  
208 **with the same letter do not significantly differ (Tukey's test) at the 0.05**  
209 **significance threshold.**

## 210 **Confirmation of toothpaste intake by ants**

211       The toothpaste solutions of watermelon cream and Pianzaihuang, which had the  
212 highest mortality for ants in the selection test, were selected for confirmation of food  
213 (toothpastes) intake by ants and dyeing rate was calculated. After different treatments,  
214 the dyeing rates of red imported fire ants were significantly different ( $F=584.9778$ ,  
215  $df_1=3$ ,  $df_2=8$ ,  $P<0.0001$ ). The staining rate of watermelon cream was close to 80%, but  
216 only one red fire ant was stained in one repeated experiment in Pianzaihuang. In the  
217 control group, the dyeing rate of sucrose and distilled water was 99% and 100% (Fig.  
218 3).

219

220 **Fig. 3 comparison of dyeing rate (mean  $\pm$  standard error) of red imported fire**  
221 **ants after feeding of 24 hours on two Chinese medicine toothpastes. Bars with**  
222 **the same letter do not significantly differ (Tukey's test) at the 0.05 significance**  
223 **threshold.**

## 224 **Toxicity of watermelon cream toothpaste against Red** 225 **Imported Fire Ants**

226 The toxic effects of different concentrations of watermelon cream toothpaste  
227 solution on red fire ants were significantly different ( $F = 60.036$ ,  $df_1 = 6$ ,  $df_2 = 54$ ,  $P <$   
228  $0.0001$ ). The mortality of red fire ants increased over time ( $F = 17.301$ ,  $df_1 = 4$ ,  $df_2 =$   
229  $54$ ,  $P < 0.0001$ ). The toxic effect was remarkable at the concentration of 10% and 20%.  
230 The mortality of ants at the concentration of 0.5%, 1% and 5% were close to that of  
231 water. The mortality rates were low, and the toxic effects were not significant. The  
232 mortality at concentration of 1% was less than that in water (Fig. 4).

233 **Fig. 4 Comparison of mortality (mean  $\pm$  standard error) of red imported fire**  
234 **ants after feeding on different concentrations of watermelon cream solution.**

## 235 **Toxic effects of extracts from Watermelon Cream on Red** 236 **Imported Fire ants**

237 The toxic activities of different components isolated from Watermelon Cream  
238 toothpaste against red imported fire ant at concentration of 10% were significantly  
239 different ( $F = 46.633$ ,  $df_1 = 4$ ,  $df_2 = 38$ ,  $P < 0.0001$ ). The mortality of red fire ants  
240 increased over time ( $F = 83.307$ ,  $df_1 = 2$ ,  $df_2 = 38$ ,  $P < 0.0001$ ). Among them, the  
241 solution of watermelon cream toothpaste at concentration of 10% had significant toxic  
242 effect on ants. The mortality of ants after feeding on S-2 and S-3 at 10% concentration

243 were higher than that of 10% watermelon cream toothpaste solution (without extraction)  
244 after 24 hours and 48 hours. Moreover, within 48 hours, all ants were dead (100%  
245 mortality). The mortality of S-1 at 10% concentration was significantly less than that  
246 of toothpaste solution (Fig. 5).

247 **Fig. 5 Comparison of mortality (mean  $\pm$  standard error) of red imported fire**  
248 **ants after feeding on different parts of watermelon cream at 10% concentration.**

249 Similarly, the toxic effects of different components of watermelon cream  
250 toothpaste on red fire ants were significantly different at 1% concentration ( $F = 77.713$ ,  
251  $df_1 = 4$ ,  $df_2 = 38$ ,  $P < 0.0001$ ). With the passage of time, the mortality of ants increased  
252 ( $F = 77.713$ ,  $df_1 = 4$ ,  $df_2 = 38$ ,  $P < 0.0001$ ). After 72 hours, only the mortality of ants  
253 after feeding on S-3 at the concentration of 1% was more than 80%, while the mortality  
254 on 1% S-1 and S-2 were less than 80%. The mortality in water treatment was less than  
255 30% (Fig. 6).

256 **Fig. 6 Comparison of mortality (mean  $\pm$  standard error) of red fire imported**  
257 **ants after feeding on different parts of watermelon cream at 1% concentration.**

258 **Selective preference of Red Imported Fire Ant to S-3 extract**

259 The results showed that there was no significant difference in the intake amount  
260 of S-3 at the concentration of 0.5% or 2% of ants compared with sucrose solution (0.5%:  
261  $t = 1.779$ ,  $df = 8$ ,  $P = 0.113$ ; 2%:  $t = 1.122$ ,  $df = 8$ ,  $P = 0.294$ ). However, the intake of  
262 1% S-3 was much more than that of the control ( $t = 3.26$ ,  $df = 8$ ,  $P = 0.015$ ) (Fig. 7).

263 **Fig. 7 Comparison of intake amount by red imported fire ant between S-3**  
264 **solution (mean  $\pm$  standard error) and sucrose solution. \* or ns above the bars**  
265 **indicates statistically significant ( $P < 0.05$ ) or not significant ( $P > 0.05$ )**  
266 **differences between S-3 solution and sucrose solution treatments (Paired t test).**

## 267 **Discussion**

268 In this study, Chinese medicine toothpaste of Yunhan Watermelon Cream had  
269 strong toxicity to red imported fire ants. The mortality of workers fed on extract S-3  
270 solution at the concentration of 1% was over 80% after 72 hours, which indicates that  
271 the traditional Chinese medicine toothpaste may be significantly more toxic than food  
272 additives such as erythritol and glycine [16]. Acute toxicity test and long-term toxicity  
273 test showed that Watermelon Cream toothpaste is safe for daily use and clinical  
274 application. Therefore, it is possible to screen out toxic active ingredients from  
275 Watermelon Cream toothpaste for fire ants, which are environmentally friendly and  
276 harmless to human.

277 In the experiment on toxicity of different concentrations of Yunhan Watermelon  
278 Cream toothpaste solution to red imported fire ant, we found that the high concentration  
279 of watermelon cream solution was toxic to workers, and the low concentration of  
280 watermelon cream solution did not affect the survival of ants significantly and even  
281 provide nutrients for them. The active ingredients of this toothpaste are *Panax*  
282 *notoginseng*, *Coptis chinensis* that has been proven to be of great benefits to human  
283 health. However, previous studies showed that flower buds extract from *p. notoginseng*  
284 containing triterpene saponins that were toxic to larvae and pupae of *Aedes albopictus*  
285 [17]. This plant contains ginsenosides and notoginsenoside as major constituents,  
286 which are toxic to insects and several microorganisms. The main chemical constituents  
287 of *C. chinensis* are quinoline alkaloids, including berberine, coptisine, palmatine, and  
288 jatrorrhizine. Naturally, occurring alkaloids in many plants are as non-toxic N-oxides.

289 However, as soon as they reach the often-alkaline digestive tracts of some insect  
290 herbivores, they are quickly reduced and forms toxic, uncharged, hydrophobic tertiary  
291 alkaloids and cause mortality of insect [18, 19]. Isoquinoline alkaloids have also been  
292 reported as antifeedant against *Hyphantria cunea* and *Agelastica coerulea*, however,  
293 this was not the case in our study. We did not find ants refusing to eat this toothpaste  
294 extract, which further indicated its potential to be developed as bait agent. The results  
295 are similar to the toxicity of stone orchid powder to *Blattella germanica* Linnaeus, and  
296 the contact toxicity of new nicotinic insecticides to *Eurygaster integriceps* Puton. The  
297 toxicity effect was not significant when the concentration was low, but the toxicity was  
298 better at high concentration [20]. Apart from Yunhan Watermelon Cream Toothpaste,  
299 we also found that the toothpaste of Pianzaihuang Yahuoqing also had a high mortality  
300 to the red imported fire ants in the toxicity test. However, in the dyeing experiment, the  
301 living red fire ants treated with the toothpaste of Pianzaihuang Yahuoqing had a very  
302 low dyeing rate, which did not indicate whether the ants consume it or not. In this case,  
303 two assumptions can be made. One is that Pianzaihuang has high toxic activity to red  
304 fire ants, so the ants died quickly after eating it. Therefore, the living red fire ants cannot  
305 be found dyed. Secondly, the high mortality of red imported fire ants was caused by  
306 starving as they refuse to intake the toothpaste, may be due to repellency of toothpaste.  
307 Previous studies showed that *radix notoginseng*, (active ingredient of this tooth paste)  
308 contain large amount of ginsenosides, a triterpenoid saponin, which are strong repellent  
309 and deterrent to *Pieris rapae* and several other herbivore insect pests [8, 21].

310 Chinese medicine toothpaste contains traditional Chinese medicine, which are

311 beneficial to oral health. Previous studies showed that the alcohol extract of traditional  
312 Chinese medicine has a good toxic effect against insect pests. For example, *Stemona*  
313 *japonica* can kill armyworm, aphid and *Tetranychus cinnabarinus*. The alcohol extract  
314 of *Celastrus angulatus*, *radix sophorae flavescens*, *Siberia Cocklebur* and *Euphorbia*  
315 *kansui* had good contact poisoning on *Tetranychus cinnabarinus*. *Stellera chamaejasme*,  
316 *Stemona japonica*, *Veratrum nigrum*, and *Siberia Cocklebur* have a good contact  
317 poisoning on the cabbage aphid [22]. The traditional Chinese medicine contains a large  
318 amount of active substances, which can kill pests with low residue, and will not pollute  
319 the environment. The toxicity of the bait made by plant is slow, which is beneficial to  
320 spread in the red fire ant colony [23].

321 Therefore, in future we are focusing to test watermelon cream extracts under the  
322 field conditions and to figure out its active ingredients to develop effective insecticide's  
323 formulations against this invasive insect pest.

## 324 **Funding**

325 This study was supported by the National Key Research and Development Project  
326 (2016YC1201200). The funders had no role in the study design, data collection and  
327 analysis, decision to publish, or preparation of the manuscript.

## 328 **Compliance with ethical standards**

## 329 **Conflict of interests**

330 The authors declare that there is no conflict of interests regarding this work.



331 **Ethical approval**

332 Guidelines on ethical issues and international agreements were considered and  
333 complied with.

334

## 335 References

- 336 1. Vinson SB. Insect Life: Invasion of the Red Imported Fire Ant (Hymenoptera: Formicidae).  
337 American Entomologist. 1997;43(43):23-39.
- 338 2. Kafle L, Wu W-J, Kao S-S, Shih C-J. Efficacy of *Beauveria bassiana* against the red imported fire  
339 ant, *Solenopsis invicta* (Hymenoptera: Formicidae), in Taiwan. Pest Management Science.  
340 2011;67(11):1434-8. doi: doi:10.1002/ps.2192.
- 341 3. Banks WA, Lofgren CS. Effectiveness of the insect growth regulator pyriproxyfen against the red  
342 imported fire ant (Hymenoptera: Formicidae). Journal of Entomological Science. 1991;26(3):331-  
343 8.
- 344 4. Kunz SE, Kemp DH. Insecticides and acaricides: resistance and environmental impact. Revue  
345 Scientifique Et Technique. 1994;13(4):1249-86.
- 346 5. Adesso KM, Oliver JB, O'Neal PA, Youssef N. Efficacy of Nootka Oil as a Biopesticide for  
347 Management of Imported Fire Ants (Hymenoptera: Formicidae). Journal of Economic  
348 Entomology. 2017;110(4):1547-55.
- 349 6. Chen J, Cantrell CL, Duke SO, Allen ML. Repellency of callicarpenal and intermedeol against  
350 workers of imported fire ants (Hymenoptera: Formicidae). Journal of Economic Entomology.  
351 2008;101(2):265-71.
- 352 7. Lekhnath K, Jen SC. Toxicity and repellency of compounds from clove (*Syzygium aromaticum*) to  
353 red imported fire ants *Solenopsis invicta* (Hymenoptera: Formicidae). Journal of Economic  
354 Entomology. 2013;106(1):131-5.
- 355 8. Zhang A, Liu Z, Lei F, Fu J, Zhang X, Ma W, et al. Antifeedant and oviposition-detering activity of  
356 total ginsenosides against *Pieris rapae*. Saudi Journal of Biological Sciences. 2017;24(8):1751-3.
- 357 9. Chen S, Chen H, Xu Y. Safe chemical repellents to prevent the spread of invasive ants. Pest  
358 Management Science. 2018. doi: doi:10.1002/ps.5184.
- 359 10. He Q, Yao C. Application of Chinese herbal medicine in toothpaste. Toothpaste industry.  
360 2008;30(8):41-2.
- 361 11. Kong T, Zhang C, Bao B, Wu W. Study and Application of active ingredients of Chinese Herbal  
362 Medicine in efficacy toothpaste. Journal of Chinese Medicinal Materials. 2013;36(1):156-62.
- 363 12. Qin Y, Chen L, Yang X, Li S, Wang Y, Tang Y, et al. Multi-residue Method for Determination of  
364 Selected Neonicotinoid Insecticides in Traditional Chinese Medicine Using Modified Dispersive  
365 Solid-phase Extraction Combined with Ultra-performance Liquid Chromatography Tandem Mass  
366 Spectrometry. Analytical Sciences. 2015;31(8):823-30.
- 367 13. Fu J, Geng X, Shi L, Fu W. Inhibitory effects of four kinds of extracts from traditional Chinese  
368 Medicine on *Botrytis cinerea* of Tomato. Northern Horticulture. 2018;09:25-9.
- 369 14. Wu HQ, Li JZ, Liu ZG. Acaricidal activities of traditional Chinese medicine against the house dust  
370 mite, *Dermatophagoides farinae*. Parasitology. 2010;137(6):975-83.
- 371 15. Jouvenaz DP, Allen GE, Banks WA, P. Wojcik D. A Survey for Pathogens of Fire Ants, *Solenopsis*  
372 spp., in the Southeastern United States. 1977;60(4):275-9. doi: 10.2307/3493922.
- 373 16. Zhang X, Chen S, Li Z, Xu Y. Effect of Sweeteners on the Survival of *Solenopsis invicta*  
374 (Hymenoptera: Formicidae). Journal of Economic Entomology. 2017;110(2):593-7. doi:  
375 10.1093/jee/tox038. PubMed PMID: 28334211.
- 376 17. Macchioni F, Siciliandi T, Magi M, Cecchi F, Cioni PL, Braca A. Activity of aqueous extract of Panax  
377 notoginseng flower buds against *Aedes albopictus* larvae and pupae. Bulletin of Insectology.

- 378 2008;61(1):31-5.
- 379 18. Fürstenberg-Hägg J, Zagrobelny M, Bak S. Plant defense against insect herbivores. *International*  
380 *Journal of Molecular Sciences*. 2013;14(5):10242-97.
- 381 19. Hartmann T. Chemical ecology of pyrrolizidine alkaloids. *Planta*. 1999;207(4):483-95.
- 382 20. Jafarpour AA, Garjan AS, Imani S, Mahjoub SM, Mahmoudvand M. Toxic effects of neonicotinoid  
383 insecticides on nymphs and adults of the sunn pest, *Eurygaster integriceps* Puton  
384 (Hemiptera:Scutelleridae). *Acta Entomologica Sinica*. 2011;54(8):938-42.
- 385 21. Gao Q. The Research of Chemical Control Techniques of Red Imported Fire Ant *Solenopsis invcita*  
386 (Buren): Huazhong Agricultural University; 2011.
- 387 22. Liu JJ, Jing M, Chen ZJ, Chen H, Nian-Hua LU, Zhang YX. Comparison of Insecticidal Efficacy of  
388 Commonly Used TCM Pesticides and Preliminary Research on Compatibility. *Chinese Journal of*  
389 *Information on Traditional Chinese Medicine*. 2016;23(7):54-7.
- 390 23. Stringer JCE, Lofgren CS, Bartlett FJ. Imported Fire Ant Toxic Bait Studies: Evaluation of Toxicants.  
391 *Journal of Economic Entomology*. 1964;57(6):941-5. doi: 10.1093/jee/57.6.941.

392

393

394

395 **Supporting information**

396 **S1 Fig. S1** Extraction steps of Yunhan watermelon cream toothpaste.

397 **S2 Table 1.** List of toothpastes with their active ingredients, other components and  
398 name of manufacturer that were used in the experiments

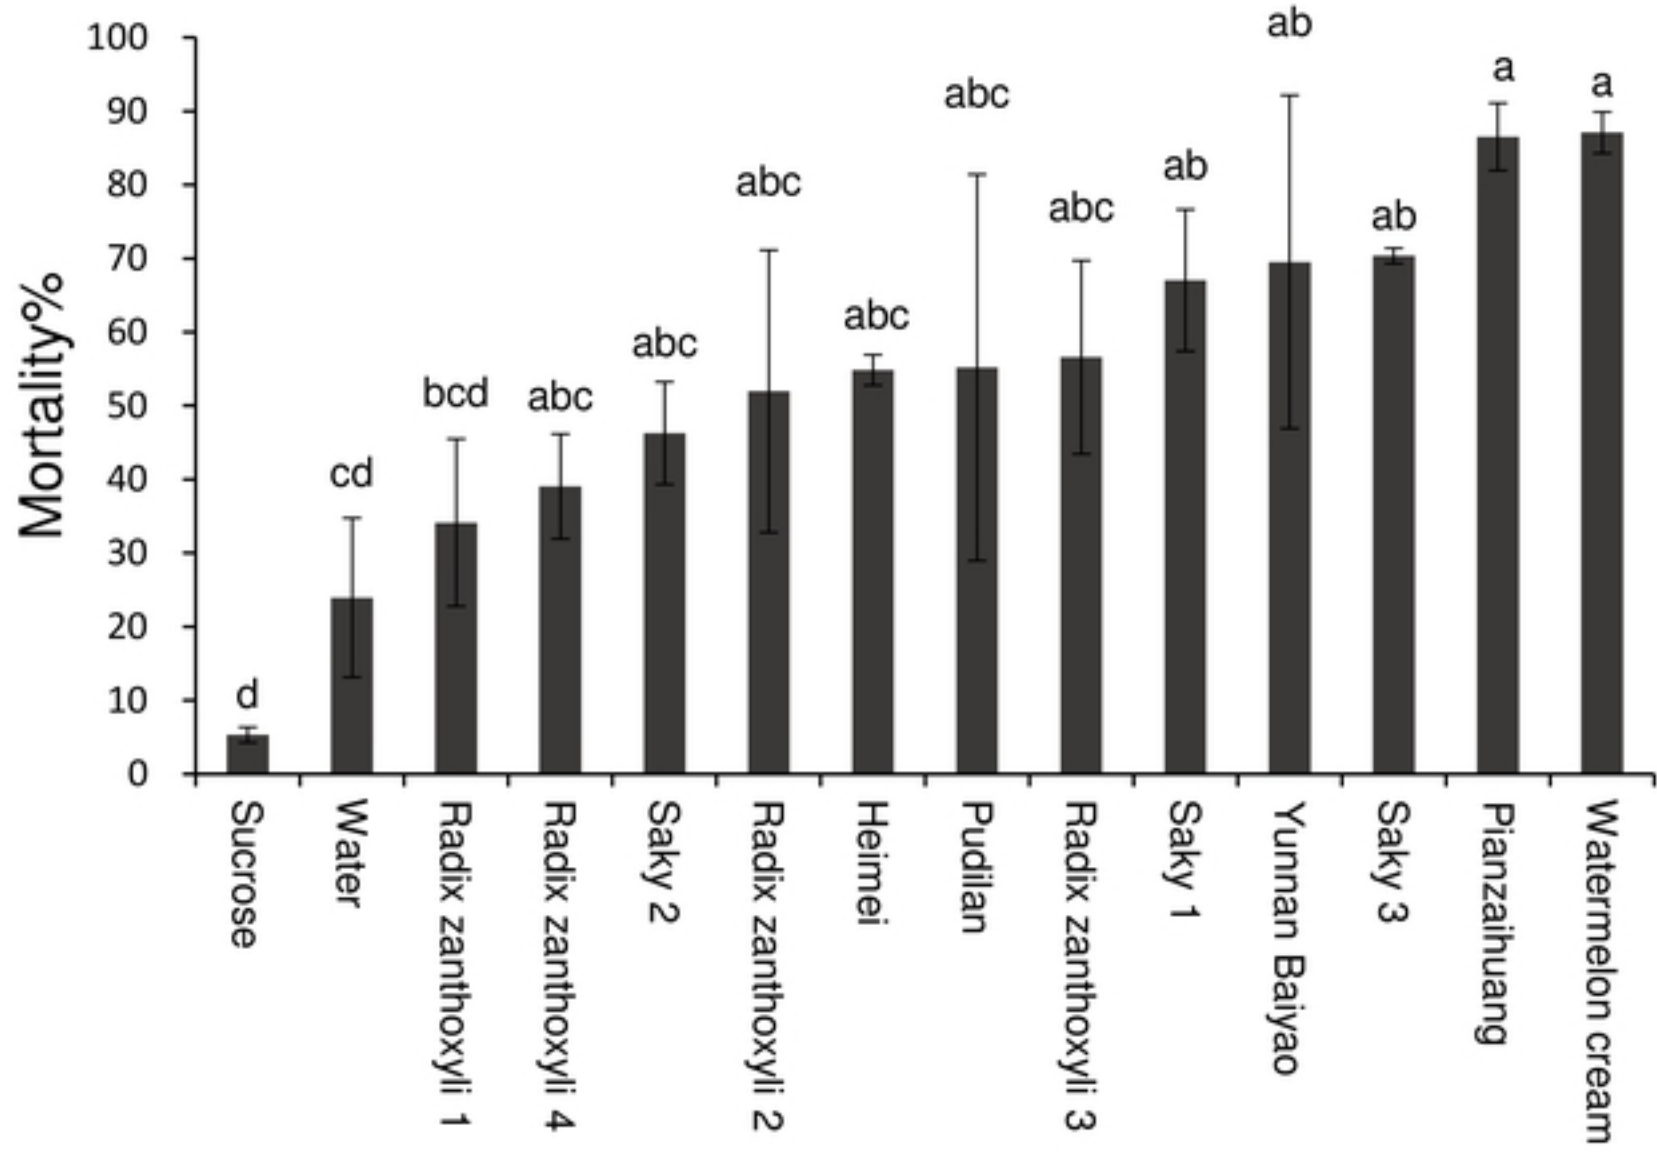

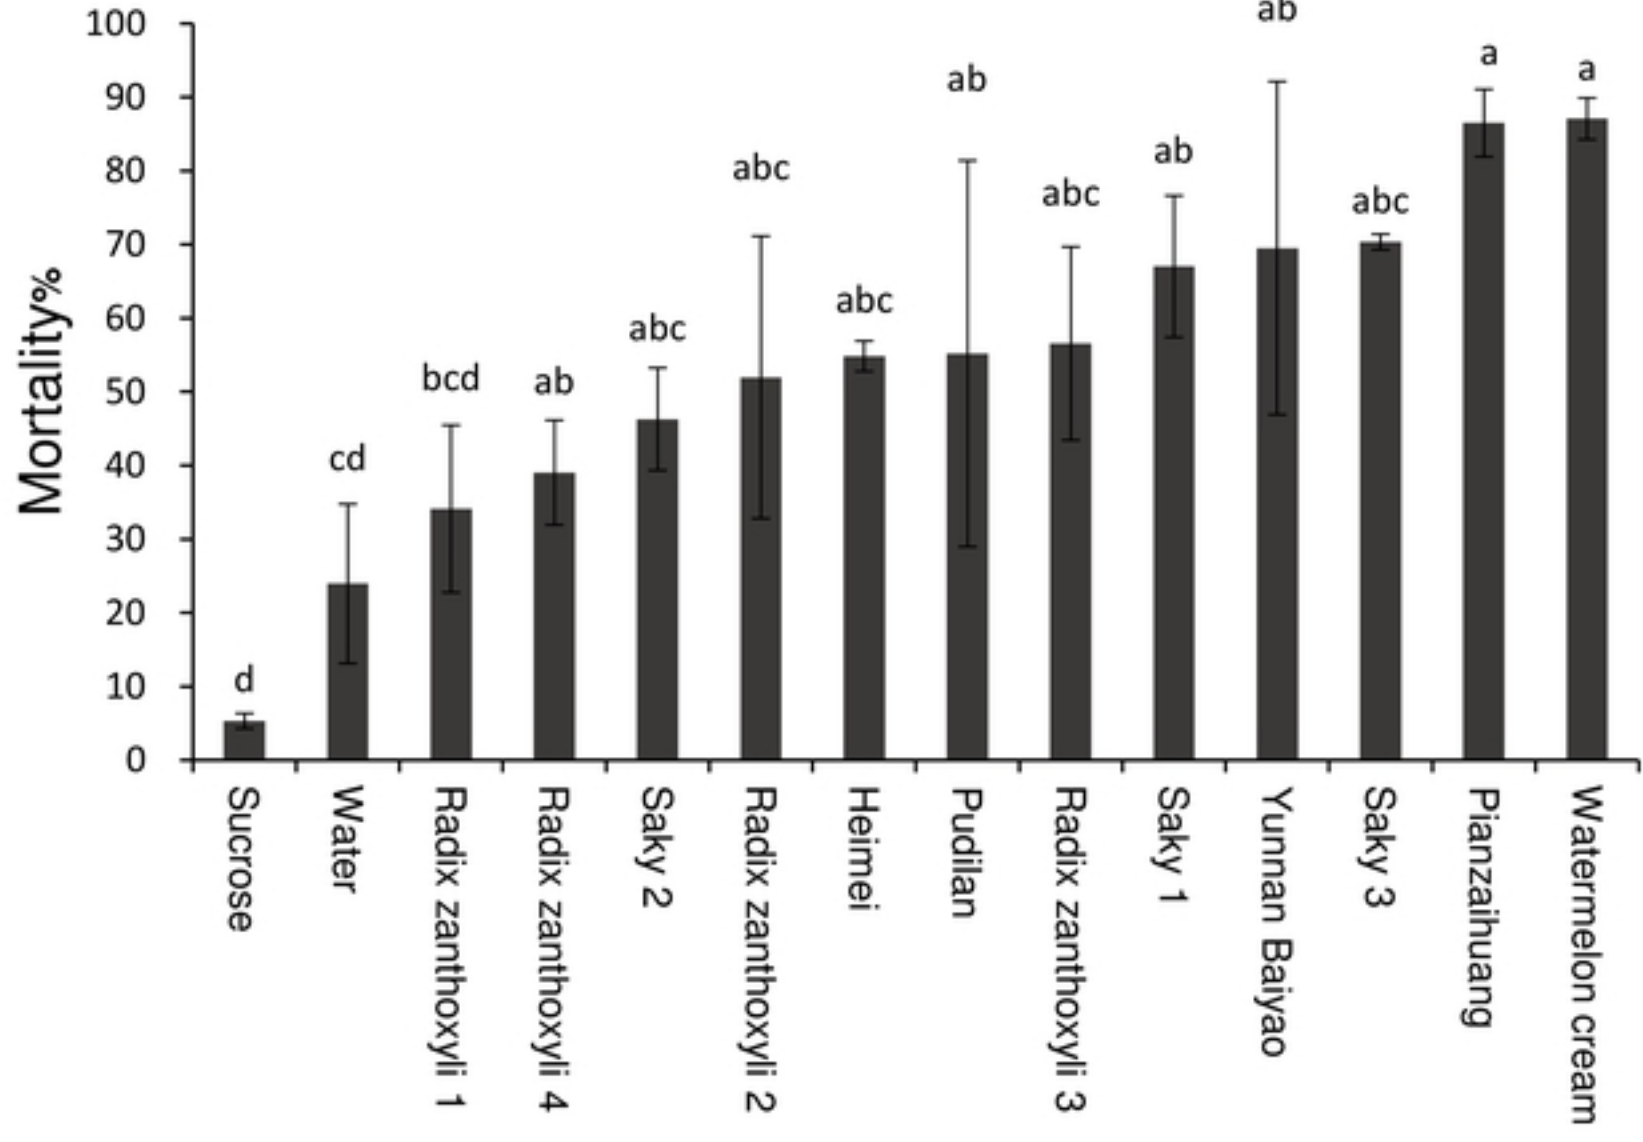

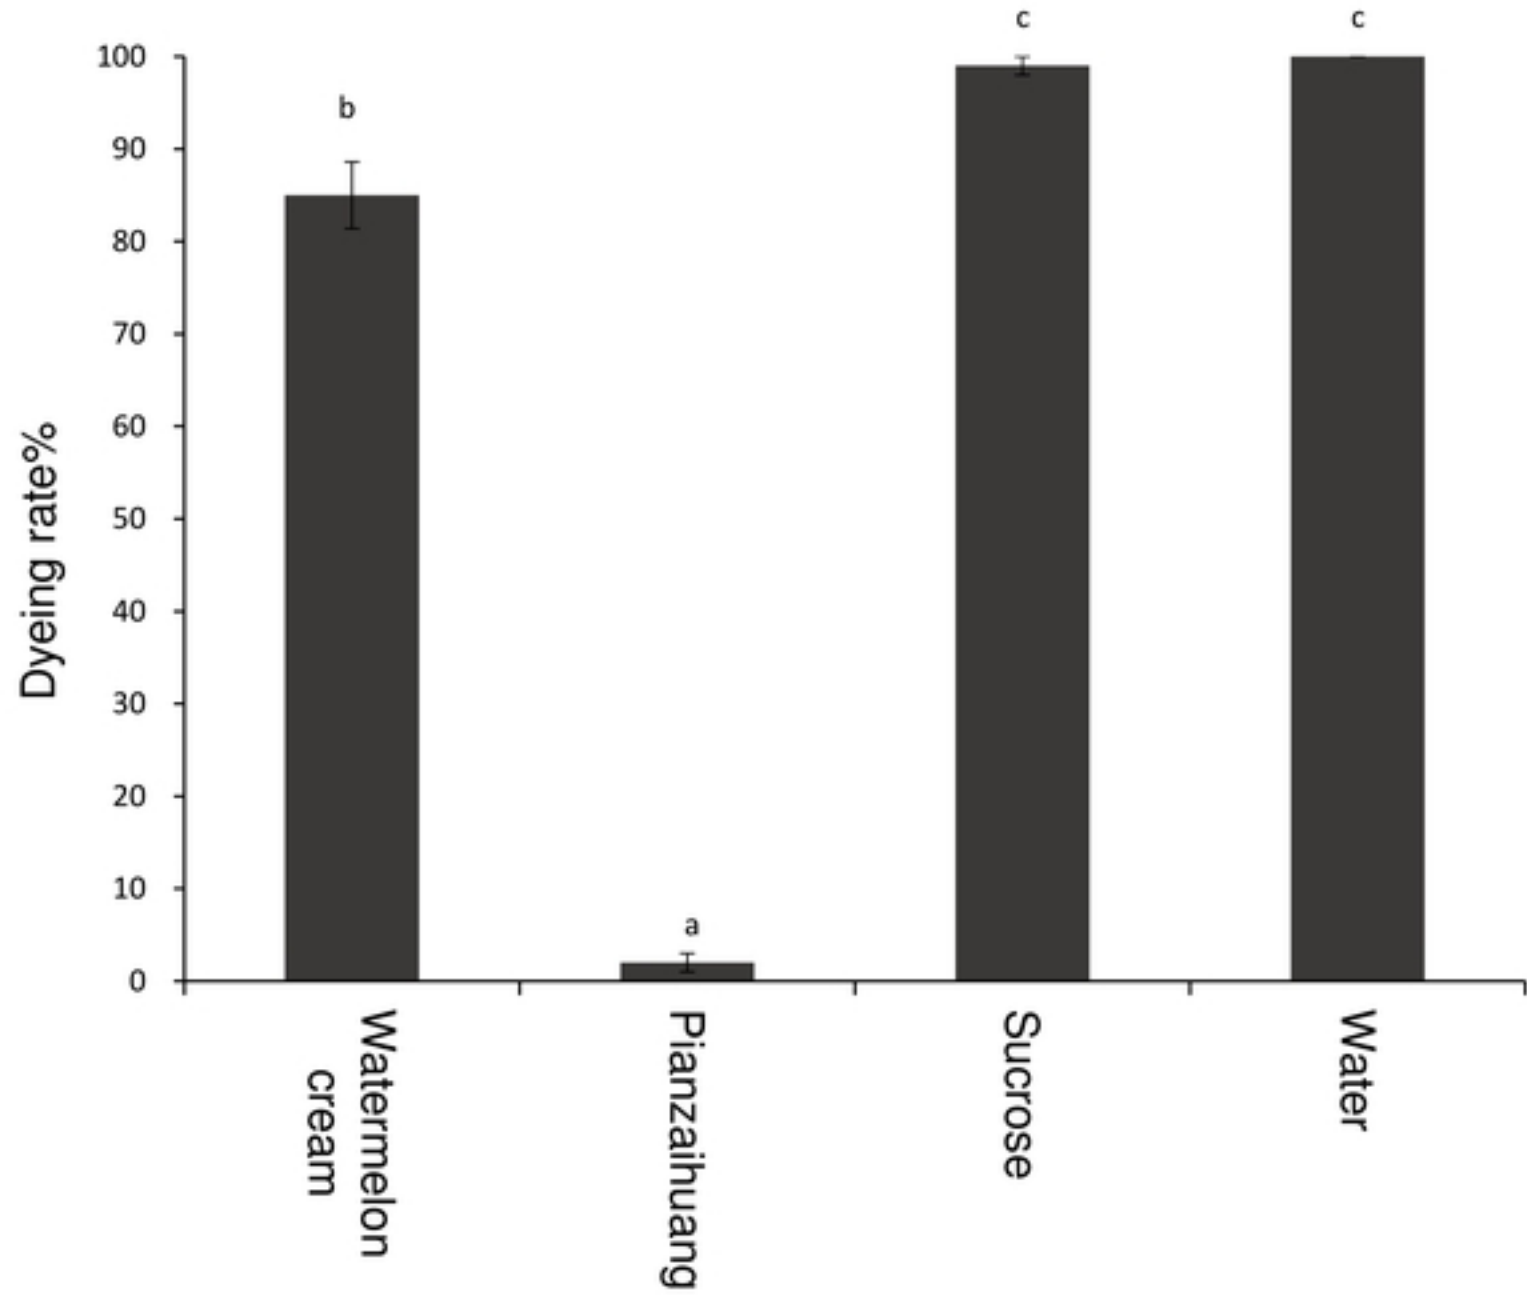

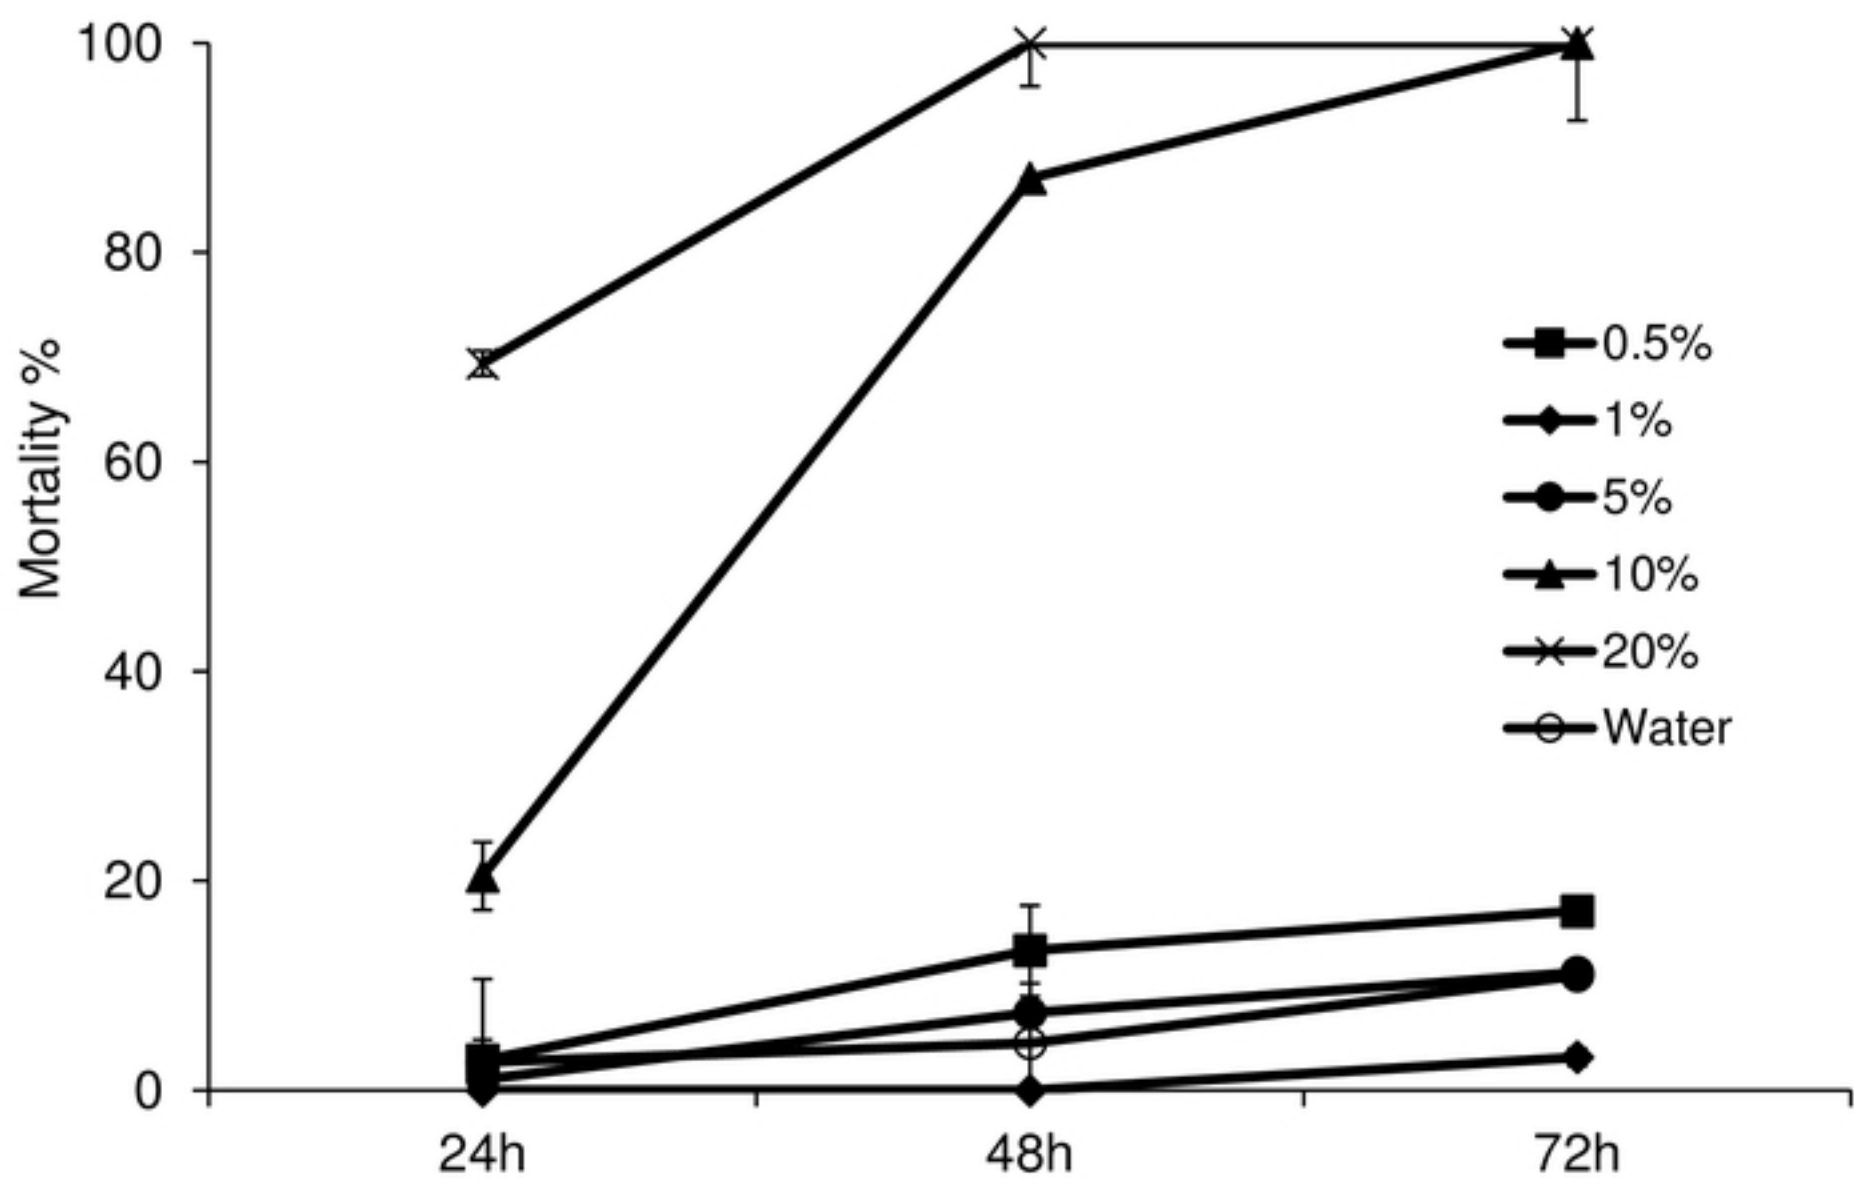



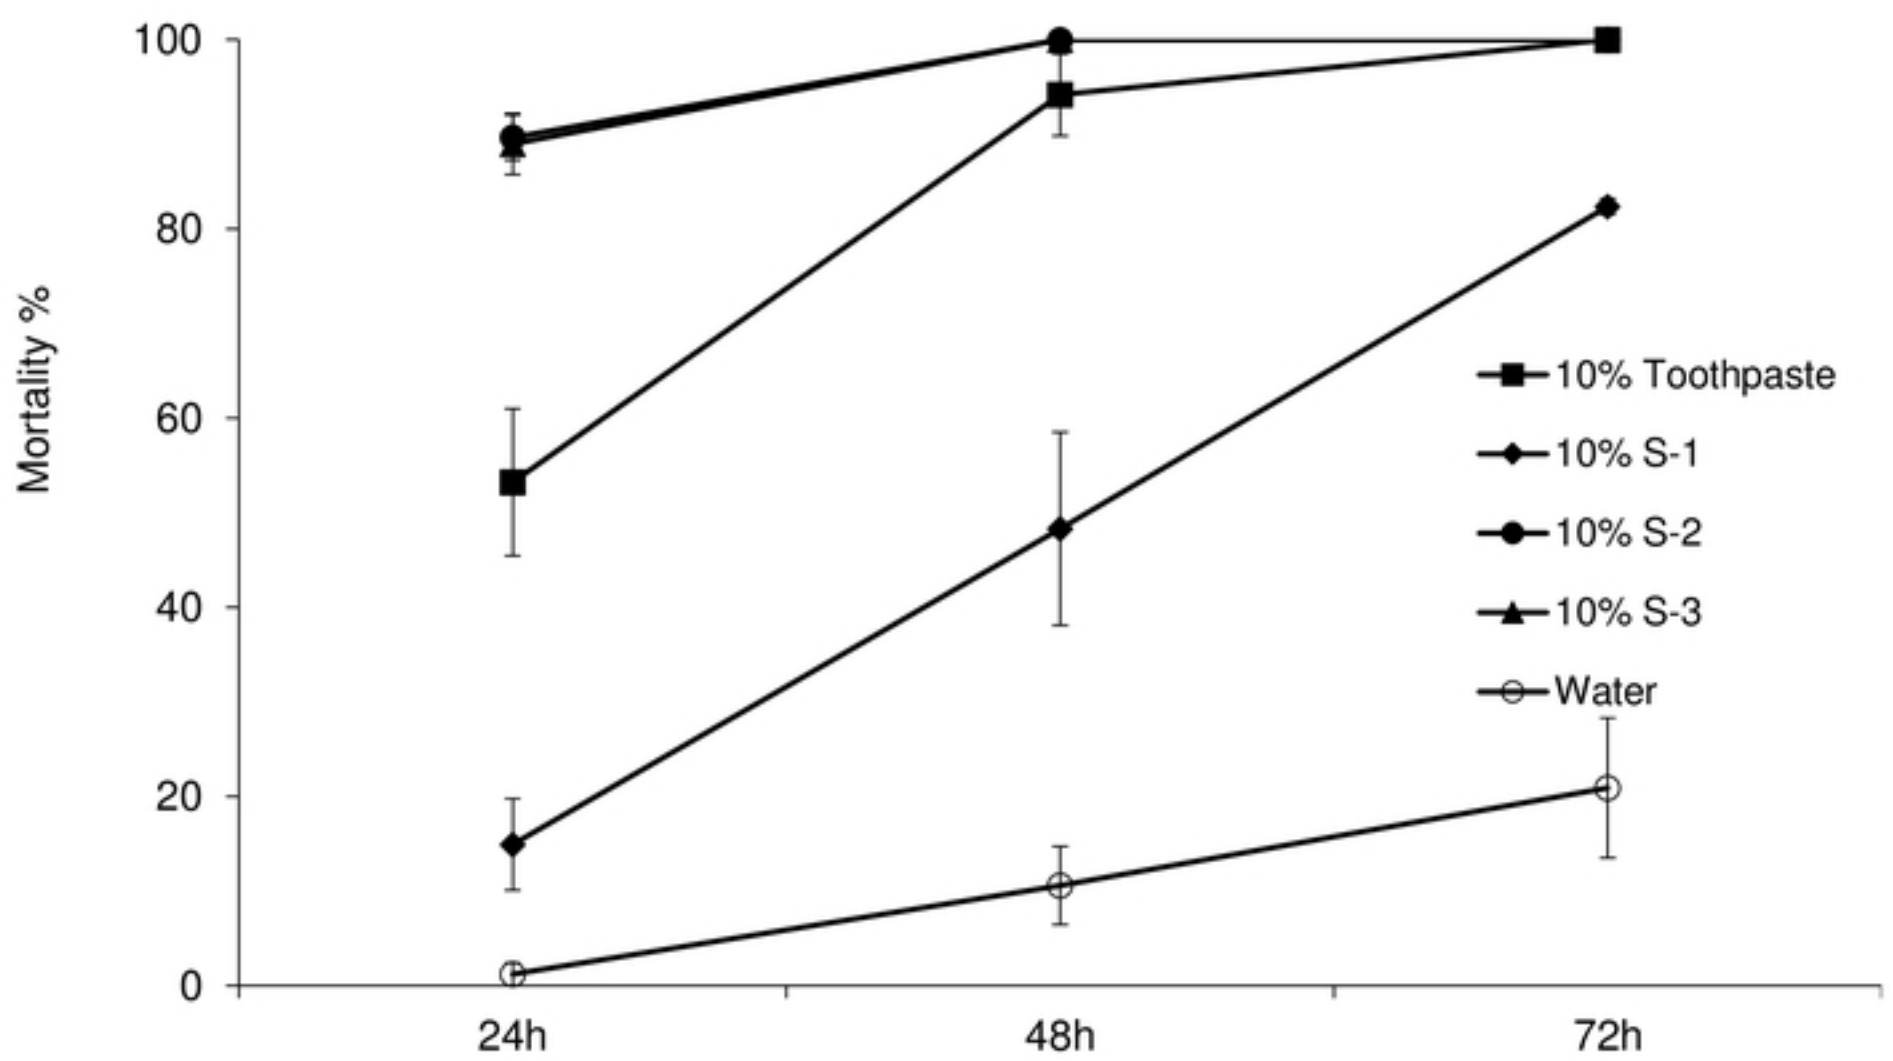

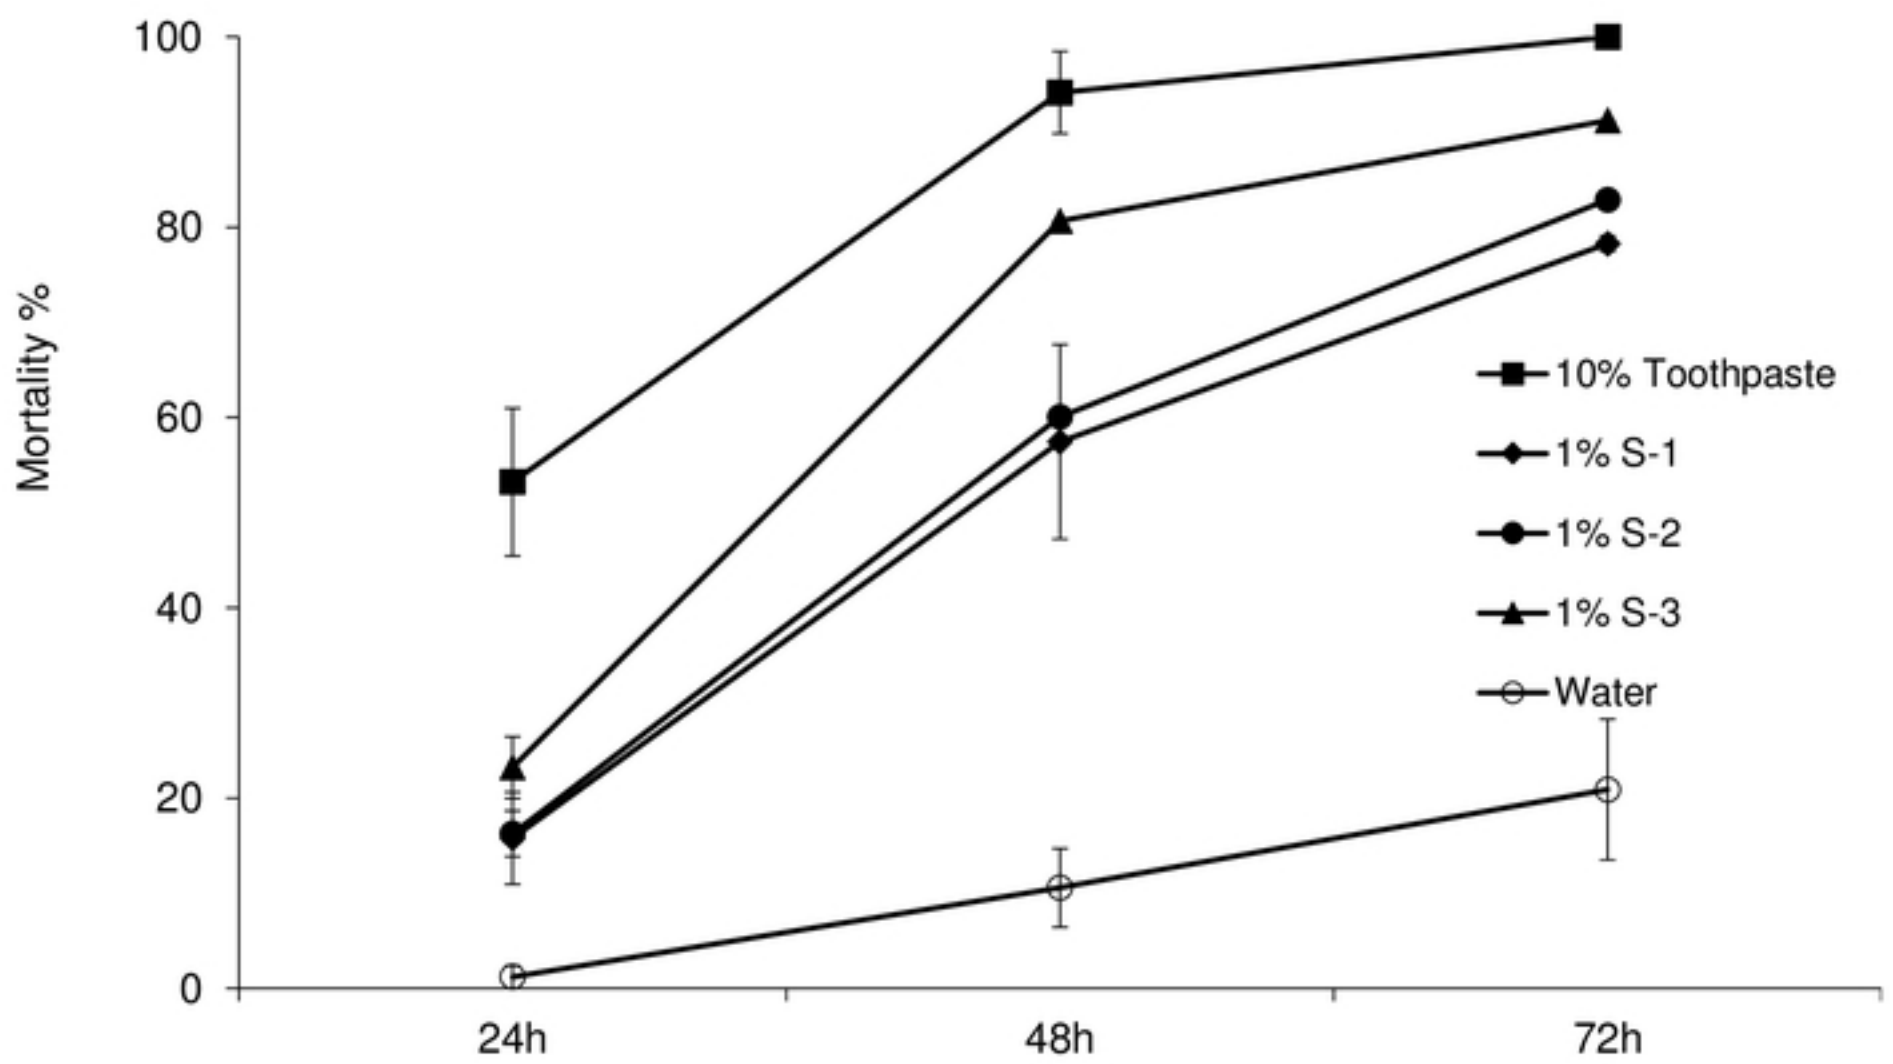

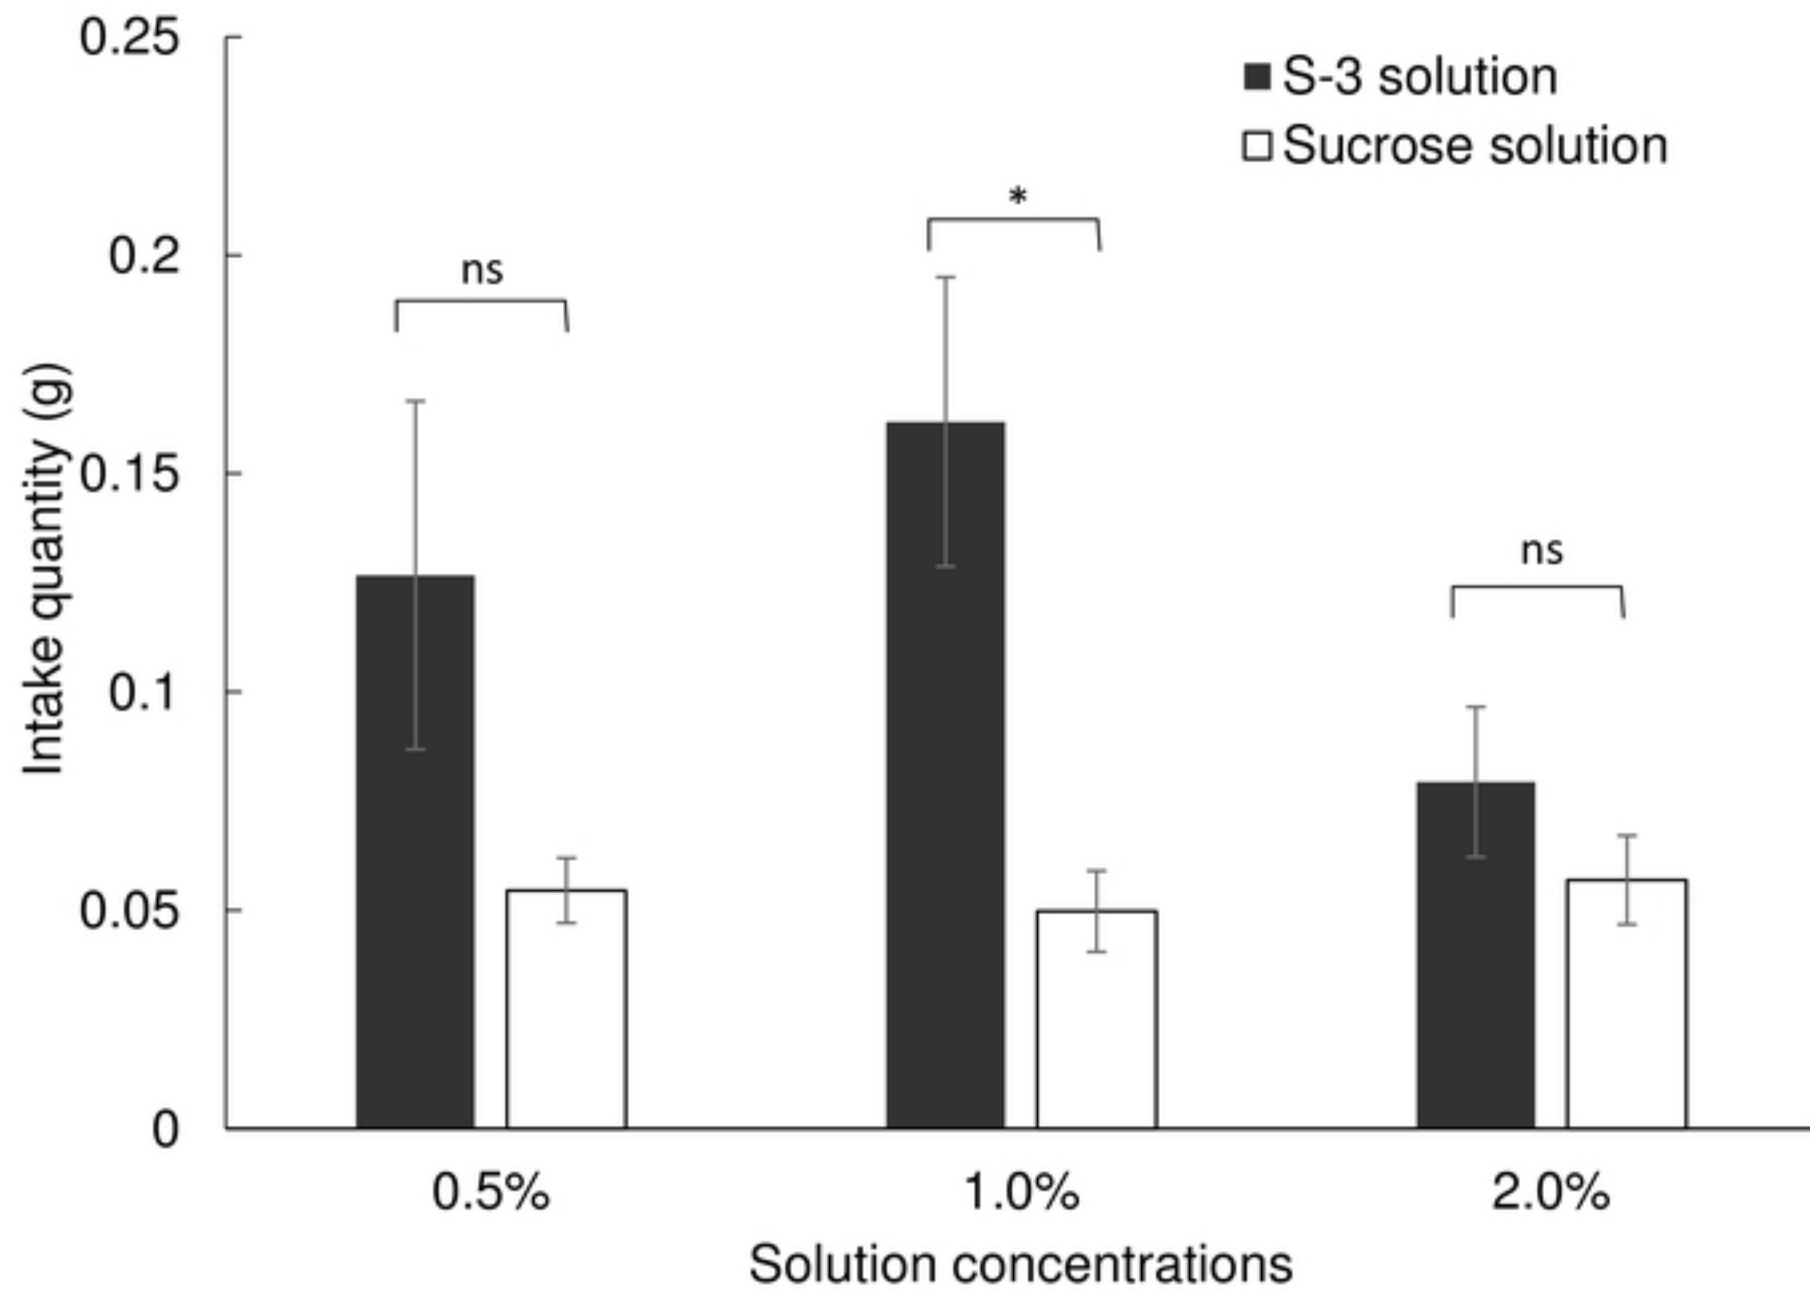

Source: http://biorxiv.org/content/10.1101/648139v1.full.pdf
